# Supplementary material for: Cerebrospinal fluid analysis in 108 patients with progressive multifocal leukoencephalopathy
Source: Springer Nature journal article supplement (doi:10.1186/s12987-020-00227-y), 2020-10-27
Supplement: MOESM1 [file 18526168]

## Multiple sclerosis patients

| Pat. | Age at diagnosis PML | underlying disease | immunosuppressive therapy  | cell count | cytology                 | lymphocytes (%) | monocytes (%) | others (%) | OCB    | Qalbumin | CSF protein (mg/l) | CSF lactate (mmol/l) | CSF JCV PCR (c/ml) | additional findings |
|------|----------------------|--------------------|----------------------------|------------|--------------------------|-----------------|---------------|------------|--------|----------|--------------------|----------------------|--------------------|---------------------|
| 1    | 43                   | RRMS               | natalizumab                | 1          | inconspicuous            | 60              | 40            |            | type 4 | 10.79    | 841                | 1.38                 | 1080               |                     |
| 2    | 42                   | RRMS               | natalizumab, since 2010    | 2          | inconspicuous            | 80              | 20            |            | type 2 | 2.94     | 296                | 1.49                 | 400                |                     |
| 3    | 32                   | RRMS               | natalizumab, since 07/2011 | 1          | inconspicuous            | 80              | 20            |            | type 2 | 5.04     | 331                | 1.56                 | 700                |                     |
| 4    | 55                   | RRMS               | natalizumab                | 1          | inconspicuous            | 80              | 20            |            | type 2 | 6.12     | 396                | 1.94                 | 800                |                     |
| 5    | 36                   | RRMS               | natalizumab                | 2          | activated                | 50              | 41            | 9          | type 2 | 3.63     | 305                | 1.52                 | n.a.               |                     |
| 6    | 32                   | RRMS               | natalizumab                | 1          | granulocytic             | 0               |               | 100        | n.d.   | n.d.     | 229                | 1.27                 | n.a.               |                     |
| 7    | 40                   | RRMS               | natalizumab                | 1          | lymphocytic              | 100             |               |            | n.d.   | n.d.     | 300                | 1.79                 | n.a.               |                     |
| 8    | 33                   | RRMS               | natalizumab                | 9          | mainly lymphocytic       | 76              |               |            | type 2 | n.d.     | 940                | 1.32                 | n.a.               |                     |
| 9    | 46                   | RRMS               | natalizumab                | 4          | mainly granulocytic      | 33              |               | 67         | n.d.   | n.d.     | 561                | 2.05                 | n.a.               |                     |
| 10   | 38                   | RRMS               | natalizumab                | 1          | lymphocytic              | 100             |               |            | n.d.   | n.d.     | 291                | 1.32                 | n.a.               |                     |
| 11   | 30                   | RRMS               | natalizumab                | 1          | lymphocytic/granulocytic | 50              |               | 50         | n.d.   | n.d.     | 791                | 1.35                 | n.a.               |                     |
| 12   | 45                   | RRMS               | natalizumab                | 3          | mainly lymphocytic       | 87,5            |               |            | type 2 | n.d.     | 536                | 1.99                 | n.a.               |                     |
| 13   | 46                   | RRMS               | natalizumab                | 2          | mainly lymphocytic       | 66              |               |            | n.d.   | n.d.     | 378                | 1.78                 | n.d.               |                     |
| 14   | 34                   | RRMS               | natalizumab                | 1          | lymphocytic              | 100             |               |            | n.d.   | n.d.     | 259                | 1.00                 | 3000               |                     |
| 15   | 40                   | RRMS               | natalizumab                | 7          | mainly lymphocytic       | 90              |               |            | n.d.   | n.d.     | 515                | 1.28                 | n.a.               |                     |
| 16   | 43                   | RRMS               | natalizumab                | 1          | lymphocytic              | 100             |               |            | n.d.   | n.d.     | 952                | 1.19                 | n.a.               |                     |
| 17   | 41                   | RRMS               | natalizumab                | 1          | lymphocytic              | 100             |               |            | type 2 | n.d.     | 417                | 1.60                 | negative           |                     |
| 18   | 35                   | RRMS               | natalizumab                | 1          | lymphocytic              | 100             |               |            | n.d.   | n.d.     | 345                | 1.12                 | positive           |                     |
| 19   | 38                   | RRMS               | natalizumab                | 2          | lymphocytic              | 100             |               |            | type 2 | n.d.     | 446                | 1.09                 | negative           |                     |
| 20   | 52                   | RRMS               | natalizumab                | 1          | lymphocytic              | 100             |               |            | n.d.   | n.d.     | 340                | 1.78                 | 193.830            |                     |
| 21   | 27                   | RRMS               | natalizumab                | 1          | lymphocytic              | 100             |               |            | type 1 | n.d.     | 259                | 0.99                 | positive           |                     |
| 22   | 42                   | RRMS               | natalizumab                | 3          | lymphocytic              | 75              |               |            | n.d.   | n.d.     | 289                | 1.20                 | 2170               |                     |
| 23   | 19                   | RRMS               | natalizumab                | 6          | lymphocytic              | 100             |               |            | n.d.   | n.d.     | 366                | 1.13                 | positive           |                     |

|    |    |      |                                      |      |                    |      |    |    |        |       |      |      |          |
|----|----|------|--------------------------------------|------|--------------------|------|----|----|--------|-------|------|------|----------|
| 24 | 34 | RRMS | natalizumab                          | 2    | lymphocytic        | 100  |    |    | type 2 | n.d.  | 364  | 1.68 | positive |
| 25 | 46 | RRMS | natalizumab                          | 15   | n.d.               | n.d. |    |    | Typ 1  | n.d.  | 460  | 2.5  | positive |
| 26 | 60 | RRMS | natalizumab                          | 3    | mainly lymphocytic | 80   |    |    | n.d.   | n.d.  | 465  | 1.04 |          |
| 27 | 39 | RRMS | natalizumab                          | 1    | lymphocytic        | 100  |    |    | n.d.   | n.d.  | 463  | 1.51 |          |
| 28 | 51 | RRMS | natalizumab                          | 1    | lymphocytic        | 100  |    |    | n.d.   | n.d.  | 226  | 1.47 |          |
| 29 | 36 | RRMS | natalizumab                          | 1    | lymphocytic        | 100  |    |    | type 2 | 4.18  | 266  | 1.46 |          |
| 30 | 46 | RRMS | natalizumab                          | 1    | lymphocytic        | 100  |    |    | n.d.   | n.d.  | 235  | 1.34 |          |
| 31 | 34 | RRMS | natalizumab                          | 1    | lymphocytic        | 100  |    |    | type 1 | 4.54  | 298  | 1.46 |          |
| 32 | 42 | RRMS | natalizumab                          | 2    | mainly lymphocytic | 57   |    |    | n.d.   | 5.43  | 399  | 1.36 |          |
| 33 | 62 | RRMS | natalizumab                          | 1    | lymphocytic        | 100  |    |    | type 3 | 10.46 | 613  | 1.61 |          |
| 34 | 54 | RRMS | natalizumab                          | n.d. | n.d.               | n.d. |    |    | n.d.   | n.d.  | n.d. | n.d. |          |
| 35 | 52 | RRMS | natalizumab                          | 1    | lymphocytic        | 100  |    |    | type 2 | 7.38  | 414  | 1.18 |          |
| 36 | 40 | RRMS | natalizumab                          | 2    | lymphocytic        | 100  |    |    | type 1 | 7.9   | 590  | 1.6  |          |
| 37 | 48 | RRMS | natalizumab                          | 1    | lymphocytic        | 100  |    |    | n.d.   | 6.24  | 514  | 1.2  |          |
| 38 | 33 | RRMS | natalizumab                          | 7    | mainly lymphocytic | 95   |    |    | type 2 | 5     | 427  | 1.58 |          |
| 39 | 47 | RRMS | natalizumab                          | n.d. | n.d.               | n.d. |    |    | n.d.   | n.d.  | n.d. | n.d. |          |
| 40 | 33 | RRMS | natalizumab                          | 1    | lymphocytic        | 100  |    |    | n.d.   | 6.5   | 375  | 1.15 |          |
| 41 | 49 | RRMS | natalizumab                          | 4    | lymphocytic        | 100  |    |    | type 3 | 8.5   | 596  | 1.4  |          |
| 42 | 46 | RRMS |                                      | 31   | lymphocytic        | 100  |    |    | n.d.   | 10.7  | 770  | 1.6  |          |
| 43 | 48 | RRMS | azathioprine; natalizumab (5 y, 9 m) | 26   | lymphocytic        | 94   | 6  |    | type 2 | 5     | 443  | 2    |          |
| 44 | 37 | RRMS | natalizumab (5 y)                    | 0    | lymphocytic        | 71   | 7  |    | type 2 | 4.9   | 428  | 1.54 |          |
| 45 | 33 | RRMS | natalizumab (4.5 y)                  | 1    | lymphomonocytic    | 49   | 27 |    | n.d.   | 3.1   | 265  | 1.65 |          |
| 46 | 45 | RRMS | natalizumab (100 infusions)          | 0    | lymphomonocytic    | 49   | 23 | 9  | type 4 | 16.3  | 1330 | 1.76 |          |
| 47 | 33 | RRMS | natalizumab (26 infusions)           | 0    | lymphocytic        | 65   | 8  | 13 | type 1 | 1.9   | 233  | 2    |          |
| 48 | 25 | RRMS | natalizumab (4 y, 50 infusions)      | 0    | lymphocytic        | 69   | 22 | 4  | type 2 | 8.7   | 755  | 2.19 |          |
| 49 | 52 | RRMS | natalizumab                          | 0    |                    | 0    | 0  |    | type 2 | 6.3   | 440  | 1.5  |          |

|    |    |      |                               |   |  |     |     |  |           |     |     |     |  |
|----|----|------|-------------------------------|---|--|-----|-----|--|-----------|-----|-----|-----|--|
| 50 | 48 | RRMS | natalizumab<br>(36 infusions) | 1 |  | 0   | 100 |  |           | 6.9 | 510 | 1.7 |  |
| 51 | 44 | RRMS | natalizumab<br>(2007-2012)    |   |  |     |     |  |           |     |     |     |  |
| 52 | 50 | RRMS | natalizumab<br>(26 infusions) | 1 |  | 100 | 0   |  | type<br>2 | 5.1 | 380 | 1.7 |  |
| 53 | 41 | RRMS | natalizumab<br>(2009-2015)    | 0 |  | 0   | 0   |  |           | 7.7 | 550 | 1.8 |  |
| 54 | 50 | RRMS | Avonex,<br>natalizumab        | 1 |  | 0   | 100 |  | type<br>2 | 8   | 415 | 2.6 |  |

## HIV patients

| Pat. | Age at<br>diagnosis<br>PML | underlyin<br>g disease              | immunosuppre<br>ssive therapy | cell<br>count | cytology              | lymph<br>ocytes<br>(%) | monoc<br>tes (%) | other<br>s (%) | OCB        | Qalbum<br>in | CSF<br>protei<br>n<br>(mg/l) | CSF<br>lactate<br>(mmol/<br>l) | CSF<br>JCV<br>PCR<br>(c/ml) | additional<br>findings                             |
|------|----------------------------|-------------------------------------|-------------------------------|---------------|-----------------------|------------------------|------------------|----------------|------------|--------------|------------------------------|--------------------------------|-----------------------------|----------------------------------------------------|
| 1    | 31                         | HIV,<br>Hodg<br>kin<br>lymp<br>homa | chemotherap<br>y (BEACOPP)    | 33            | activated             | 100                    | 0                |                | type<br>3  | 13.45        | 1168                         | 2.31                           | 1080                        |                                                    |
| 2    | 47                         | HIV                                 | none                          | 2             | inconspic<br>uous     | 85                     | 10               | 5              | n.a.       | 6.76         | 442                          | 1.62                           | 400                         |                                                    |
| 3    | 50                         | HIV                                 | none                          | 1             | inconspic<br>uous     | 90                     | 10               |                | type<br>3  | 9.45         | 487                          | 1.66                           | 700                         |                                                    |
| 4    | 57                         | HIV                                 | none                          | 25            | activated             | 80                     | 17               | 3              | type<br>3a | 21.24        | 1017                         | 2.08                           | 800                         |                                                    |
| 5    | 43                         | NHL,<br>HIV                         | n.a.                          | 10            | slightly<br>activated | 75                     | 25               |                | type<br>2  | 6.2          | 513                          | n.d.                           | n.a.                        |                                                    |
| 6    | 37                         | HIV                                 | none                          | 34            | activated             | n.a.                   | n.a.             |                | type<br>4  | 15.6         | 1040                         | 1.84                           | n.a.                        |                                                    |
| 7    | n.a.                       | HIV                                 | none                          | n.a.          | n.a.                  | n.a.                   | n.a.             |                | n.a.       | n.a.         | n.a.                         | n.a.                           | n.a.                        |                                                    |
| 8    | n.a.                       | HIV                                 | none                          | n.a.          | n.a.                  | n.a.                   | n.a.             |                | n.a.       | n.a.         | n.a.                         | n.a.                           | n.a.                        |                                                    |
| 9    | 39                         | HIV                                 | none                          | 1             | inconspic<br>uous     | n.a.                   | n.a.             |                | type<br>2  | 6            | 402                          | 1.83                           | n.a.                        |                                                    |
| 10   | 36                         | HIV                                 | none                          | 1             | inconspic<br>uous     | n.a.                   | n.a.             |                | n.a.       | 14.69        | 800                          | n.a.                           | n.a.                        |                                                    |
| 11   | 73                         | HIV                                 | none                          | 1             | n.a.                  | n.a.                   | n.a.             |                | type<br>3  | 25.1         | 1076                         | 2.64                           | n.a.                        |                                                    |
| 12   | 40                         | HIV                                 | none                          | 3             | slightly<br>activated | n.a.                   | n.a.             |                |            | 5.29         | 410                          | 1.7                            | n.a.                        |                                                    |
| 13   | 28                         | HIV                                 | none                          | n.d.          | n.d.                  | n.d.                   | n.d.             | n.d.           | n.d.       | n.d.         | n.d.                         | n.d.                           | n.d.                        | histologica<br>l<br>diagnostic<br>confirmati<br>on |
| 14   | 62                         | HIV                                 | none                          | 6             | activated             | 90                     | 10               |                | type<br>4  | 12.4         | 851                          | n.a.                           | 3000                        |                                                    |
| 15   | 53                         | HIV                                 | none                          | 1             | n.a.                  | n.a.                   | n.a.             |                |            | 2.81         | 239                          | n.a.                           | n.a.                        |                                                    |
| 16   | 40                         | HIV                                 | none                          | 2             | n.d.                  | n.d.                   | n.d.             |                | type<br>2  | 11.8         | 602                          | n.a.                           | n.a.                        |                                                    |
| 17   | 49                         | HIV                                 | none                          | 13            | n.a.                  | n.a.                   | n.a.             |                | n.a.       | n.a.         | n.a.                         | n.a.                           | negati<br>ve                | histologica<br>l<br>diagnostic<br>confirmati<br>on |

|    |    |     |      |     |             |      |      |     |        |       |      |      |          |
|----|----|-----|------|-----|-------------|------|------|-----|--------|-------|------|------|----------|
| 18 | 46 | HIV | none | 2.3 | n.a.        | n.a. | n.a. |     | type 4 | 5.2   | 566  | 1.88 | positive |
| 19 | 47 | HIV | none | 7   | activated   | 95   | 5    |     | type 3 | 14.38 | 737  | 1.43 | negative |
| 20 | 51 | HIV |      | 1   | n.d.        | n.d. | n.d. |     | type 1 | 7.3   | 623  | 1.74 | 193.830  |
| 21 | 42 | HIV |      | 1   | lymphocytic | 78   | 2    | 1   | n.d.   | 16.5  | 1260 | 1.42 | positive |
| 22 | 40 | HIV |      | 4   | lymphocytic | 51   | 8    | 9   | type 1 | 8.2   | 630  | 1.9  | 2170     |
| 23 | 41 | HIV |      | 0   | lymphocytic | 79   | 2    | 10  | type 2 | 5.5   | 698  | 1.42 | positive |
| 24 | 48 | HIV | -    | 34  |             |      |      | 100 | type 3 | 11.3  | 1040 | 1.9  | positive |
| 25 | 54 | HIV | -    | 1   |             | 0    | 100  |     |        | 10.2  | 570  | 1.5  | positive |

### Patients with hematological malignancies (lymphoma group)

| Pat. | Age at diagnosis PML | underlying disease | immunosuppressive therapy                                                               | cell count | cytology           | lymphocytes (%) | monocytes (%) | others (%) | OCB     | Qalbumin | CSF protein (mg/l) | CSF lactate (mmol/l) | CSF JCV PCR (c/ml) | additional findings                  |
|------|----------------------|--------------------|-----------------------------------------------------------------------------------------|------------|--------------------|-----------------|---------------|------------|---------|----------|--------------------|----------------------|--------------------|--------------------------------------|
| 1    | 77                   | NHL                | rituximab                                                                               | 3          | inconspicuous      | 75              | 25            |            | type 4  | 6.03     | 369                | n.a.                 | 200.000            |                                      |
| 2    | 69                   | NHL                | rituximab, bendamustine                                                                 | n.a.       | n.a.               | n.a.            | n.a.          |            | n.a.    | n.a.     | n.a.               | n.a.                 | 2890               |                                      |
| 3    | 55                   | CLL                | rituximab                                                                               | 7          | activated          | 89              | 11            |            | type 4  | 10.02    | 742                | 1.93                 | 500                |                                      |
| 4    | 73                   | NHL                | rituximab                                                                               | 1          | inconspicuous      | 80              | 20            |            | type 2  | 2.69     | 301                | 1.4                  | negative           |                                      |
| 5    | 77                   | B-CLL              | rituximab                                                                               | 8          | inconspicuous      | 90              | 10            |            | type 1  | 4.65     | 374                | 1.88                 | 250                |                                      |
| 6    | 61                   | NHL                | n.a.                                                                                    | 4          | slightly activated | 90              | 10            |            | type 4  | 9.1      | 563                | 1.62                 | n.a.               |                                      |
| 7    | 54                   | multiple myeloma   | multiple chemotherapy (cyclophosphamide, bendamustine, and others), 5x autologous PBSCT | 1          | inconspicuous      | n.a.            | n.a.          |            | type 4  | 19.59    | 820                | 1.73                 | <180               |                                      |
| 8    | 63                   | T-LGL-leukemia     | MTX                                                                                     | 1          | slightly activated | 80              | 20            |            | type 3  | 6.49     | 440                | 1.92                 | 203                |                                      |
| 9    | 69                   | NHL                | rituximab, bendamustine                                                                 | 3          | slightly activated | 78              | 22            |            | type 2a | 4.18     | 329                |                      | 90.000             |                                      |
| 10   | 73                   | NHL                | mitoxantrone, melphalan, prednisolone                                                   | 8          | slightly activated | 44              | 56            |            | type 3  | 21.6     | 773                | 1.73                 | negative           | histological diagnostic confirmation |
| 11   | 77                   | NHL                | rituximab, bendamustine 07-11/2019                                                      | 5          | activated          | 35              | 65            |            | type 4  | 5.81     | 411                | 1.77                 | < 500              |                                      |
| 12   | 69                   | multiple myelo     |                                                                                         | 6          |                    | 0               | 100           |            |         | 20.1     | 1030               | 2.8                  | positive           |                                      |

ma

|    |    |       |                                                 |    |             |    |     |    |        |      |     |      |                |
|----|----|-------|-------------------------------------------------|----|-------------|----|-----|----|--------|------|-----|------|----------------|
| 13 | 69 | T-NHL | CHOP-21 (6x),DHAP (2x)                          | 3  |             | 0  | 100 |    | type 4 | 6.2  | 370 | 1.5  | negative       |
| 14 | 70 | NHL   | rituximab, bendamustine                         | 1  |             | 0  | 100 |    |        | 15.7 | 800 | 1,9  | 20.00<br>0.000 |
| 15 | 73 | CLL   | Multiple chemotherapy, Pembrolizumab, Rituximab | 0  | lymphocytic | 78 | 10  | 8  | type 1 | 6.6  | 520 | 1.97 | positive       |
| 16 | 75 | CLL   | chemotherapy                                    | 0  |             | 28 | 16  | 9  | type 1 | 5.6  | 360 | 1.62 | 11.65<br>0     |
| 17 | 62 | CLL   | chemotherapy (R-Benda)                          | 3  | lymphocytic | 75 | 6   | 8  | type 2 | 6    | 500 | n.a. | > 10<br>Mio    |
| 18 | 39 | DLBCL | plasmapheresis                                  | 1  | lymphocytic | 71 | 15  | 13 | type 1 | 7.1  | 610 | 2.11 | 1150           |
| 19 | 24 | AML   | immunoglobulins                                 | 14 | lymphocytic | 97 | 1   | 2  | type 4 | 8    | 760 | 1.57 | 15             |

### Transplant patients

| Pat. | Age at diagnosis PML | underlying disease                          | immunosuppressive therapy               | cell count | cytology      | lymphocytes (%) | monocytes (%) | others (%) | OCB    | Qalbumin | CSF protein (mg/l) | CSF lactate (mmol/l) | CSF JCV PCR (c/ml) | additional findings                  |
|------|----------------------|---------------------------------------------|-----------------------------------------|------------|---------------|-----------------|---------------|------------|--------|----------|--------------------|----------------------|--------------------|--------------------------------------|
| 1    | 65                   | kidney transplant                           | tacrolimus                              | 8          | activated     | 75              | 25            |            | type 3 | 7.47     | 410                | 1.35                 | 500                |                                      |
| 2    | 72                   | liver transplant                            | MMF, tacrolimus                         | 1          | inconspicuous | n.a.            | n.a.          |            | type 1 | 10.6     | 750                | 1.73                 | negative           | histological diagnostic confirmation |
| 3    | 50                   | twofold liver transplant, kidney transplant | ciclosporin, MMF                        | 1          | inconspicuous | 60              | 40            |            | type 4 | 3.6      | 320                | 1.37                 | 400                |                                      |
| 4    | 54                   | lung transplant; Hodgkin lymphoma           | rituximab, tacrolimus, MMF, ciclosporin | 9          | activated     | 76              | 24            |            | type 2 | 8.72     | 578                | 1.75                 | 19.00<br>0         |                                      |

### Others

| Pat. | Age at diagnosis PML | underlying disease  | immunosuppressive therapy | cell count | cytology      | lymphocytes (%) | monocytes (%) | others (%) | OCB    | Qalbumin | CSF protein (mg/l) | CSF lactate (mmol/l) | CSF JCV PCR (c/ml) | additional findings                  |
|------|----------------------|---------------------|---------------------------|------------|---------------|-----------------|---------------|------------|--------|----------|--------------------|----------------------|--------------------|--------------------------------------|
| 1    | 77                   | bronchial carcinoma | unknown chemotherapy      | 3          | lymphocytic   | 70              | 30            |            | type 4 | 6.27     | 311                | n.a.                 | 100.0<br>00        |                                      |
| 2    | 68                   | unknown             | none                      | 22         | activated     | 80              | 14            | 6          | type 2 | 7.8      | 574                | 1.93                 | 1000               |                                      |
| 3    | 50                   | sarcoidosis         | none                      | 4          | lytic cells   | n.a.            | n.a.          |            | type 2 | n.a.     | 440                | 1.61                 | n.a.               | histological diagnostic confirmation |
| 4    | 81                   | unknown             | none                      | 1          | inconspicuous | 60              | 40            |            | type 4 | 4.68     | 340                | 1.57                 | 11.00<br>0         |                                      |

|   |    |                             |                                                                     |      |               |      |      |           |       |      |      |          |      |                                            |
|---|----|-----------------------------|---------------------------------------------------------------------|------|---------------|------|------|-----------|-------|------|------|----------|------|--------------------------------------------|
| 5 | 36 | CVID                        | none                                                                | n.a. | n.a.          | n.a. | n.a. | n.a.      | n.a.  | n.a. | n.a. | n.a.     | n.a. | histological<br>diagnostic<br>confirmation |
| 6 | 52 | microscopic<br>polyangiitis | cyclophosphamide (6<br>cycles),<br>rituximab<br>05/2014-<br>09/2017 | 2    | inconspicuous | 48   | 52   | type<br>4 | 10.24 | 720  | 1.71 | negative |      |                                            |
