# Supplementary material for: Cerebrospinal fluid analysis in 108 patients with progressive multifocal leukoencephalopathy
Source: Springer Nature journal article supplement (doi:10.1186/s12987-020-00227-y), 2020-10-27
Supplement: MOESM2 [file 18526168]

| sex | Age at LP (years) | cell count (cells/ $\mu$ l) | OCB    | Qalbumin | CSF protein (mg/l) | CSF lactate (mmol/l) | suspected diagnosis |
|-----|-------------------|-----------------------------|--------|----------|--------------------|----------------------|---------------------|
| f   | 25                | 0.3                         | type 1 | 2.83     | 244                | 1.57                 | IIH                 |
| m   | 79                | 0.7                         | type 4 | 9.31     | 550                | 2.07                 | NPH                 |
| m   | 61                | 0.3                         | type 1 | 9.95     | 663                | 1.64                 | IIH                 |
| f   | 56                | 1.0                         | type 1 | 3.97     | 318                | 1.58                 | NPH                 |
| m   | 67                | 2.3                         | type 1 | 7.52     | 533                | 1.85                 | NPH                 |
| f   | 31                | 0.7                         | type 4 | 13.63    | 845                | 1.44                 | IIH                 |
| f   | 48                | 4                           | type 3 | 7.6      | 600                | 1.66                 | IIH                 |
| f   | 41                | 0.7                         | type 1 | 6.6      | 507                | 1.44                 | IIH                 |
| f   | 30                | 0.7                         | type 4 | 8.68     | 536                | 1.49                 | IIH                 |
| f   | 81                | 0.7                         | type 4 | 4.26     | 329                | n.a.                 | NPH                 |
| f   | 79                | 1.7                         | type 4 | 11.22    | 611                | 1.62                 | NPH                 |
| m   | 84                | 1.3                         | type 4 | 7.31     | 494                | 1.76                 | NPH                 |
| f   | 35                | 0.3                         | type 1 | 5.08     | 364                | 1.40                 | IIH                 |
| f   | 29                | 2                           | type 1 | 4.09     | 312                | 1.40                 | IIH                 |
| m   | 31                | 0.3                         | type 1 | 3.07     | 225                | 1.34                 | IIH                 |
| f   | 33                | 0.7                         | type 1 | 8.53     | 472                | 1.67                 | IIH                 |
| m   | 31                | 3.3                         | type 1 | 2.97     | 273                | 1.55                 | NPH                 |
| m   | 27                | 0.3                         | type 4 | 4.73     | 363                | 1.23                 | IIH                 |
| f   | 40                | 0.7                         | type 1 | 9.09     | 667                | 1.41                 | IIH                 |
| m   | 65                | 2.3                         | type 4 | 6.21     | 447                | 1.36                 | IIH                 |
| m   | 79                | 0.7                         | type 1 | 4.74     | 408                | 1.84                 | NPH                 |
