# Supplementary material for: Cerebrospinal fluid analysis in 108 patients with progressive multifocal leukoencephalopathy
Source: Springer Nature journal article supplement (doi:10.1186/s12987-020-00227-y), 2020-10-27
Supplement: MOESM3 [file 18526168]

| sex | Age at LP (years) | cell count (cells/ $\mu$ l) | OCB     | Qalbumin | CSF protein (mg/l) | CSF lactate (mmol/l) | additional information  |
|-----|-------------------|-----------------------------|---------|----------|--------------------|----------------------|-------------------------|
| m   | 42                | 0.3                         | type 2a | 5.46     | 431                | 2.45                 |                         |
| m   | 52                | 5                           | type 3  | 6.38     | 544                | 2.29                 |                         |
| m   | 43                | 1.7                         | type 4  | 8.29     | 551                | 1.53                 |                         |
| f   | 36                | 1                           | type 2  | 3.03     | 270                | n.a.                 |                         |
| m   | 64                | 1                           | type 3a | 4.44     | 435                | 1.65                 |                         |
| f   | 25                | 0.7                         | type 3a | 5.9      | 441                | 1.55                 |                         |
| m   | 50                | 2                           | type 2  | 11.63    | 734                | 2.19                 |                         |
| m   | 80                | 1.3                         | type 4  | 5.95     | 463                | 1.79                 |                         |
| f   | 43                | 4                           | type 3  | 3.51     | 307                | n.a.                 |                         |
| m   | 26                | 2                           | type 3  | 5.19     | 394                | n.a.                 |                         |
| f   | 54                | 1                           | type 3  | 10.85    | 614                | 2.47                 |                         |
| m   | 30                | 0.3                         | type 4  | 8.14     | 453                | 1.55                 |                         |
| m   | 30                | 0.3                         | type 1  | 5.94     | 408                | 2.25                 |                         |
| m   | 53                | 1                           | type 2  | 2.81     | 239                | n.a.                 |                         |
| m   | 56                | 16                          | type 3a | 1.4      | 112                | 1.54                 | suspected toxoplasmosis |
| m   | 83                | 1                           | type 3  | 7.76     | 552                | 1.92                 |                         |
| m   | 43                | 2                           | type 4  | 7.56     | 443                | 2.58                 |                         |
| m   | 47                | 1                           | type 2  | 6.7      | 626                | 1.77                 |                         |
| m   | 69                | 63                          | n.a.    | 10.9     | 814                | 1.63                 |                         |
| w   | 42                | 21                          | type 3  | 6.3      | 1280               | 2.04                 |                         |
| w   | 51                | 1                           | n.a.    | 4.1      | 376                | 1.82                 |                         |
| w   | 62                | 1                           | type 3  | 3.4      | 245                | 1.57                 |                         |
| w   | 53                | 5                           | type 3  | 10.3     | 715                | 1.74                 |                         |
| m   | 22                | 4                           | type 4  | 7.1      | 567                | 1.44                 |                         |
| m   | 47                | 1                           | type 2  | 8.2      | 661                | 1.58                 |                         |
| m   | 38                | 1                           | type 1  | 4.4      | 368                | 1.36                 |                         |
| w   | 64                | 5                           | type 2  | 7.5      | 674                | 1.94                 |                         |
| w   | 44                | 1                           | type 2  | 4.5      | 424                | 1.71                 |                         |
| w   | 66                | 0                           | type 1  | 5.1      | 477                | 1.69                 |                         |
| m   | 55                | 0                           | type 2  | 8.7      | 646                | 2.11                 |                         |
| w   | 25                | 0                           | type 1  | 3.2      | 269                | 1.26                 |                         |
| m   | 52                | 1                           | type 1  | 7.6      | 698                | 1.63                 |                         |
| w   | 48                | 3                           | type 3  | 9.7      | 882                | 1.40                 |                         |
| m   | 69                | 0                           | type 3  | 8.3      | 668                | 2.90                 |                         |
| m   | 45                | 3                           | type 3  | 9.7      | 741                | 1.67                 |                         |
| w   | 41                | 1                           | type 3  | 1.5      | 209                | 1.51                 |                         |
| m   | 50                | 2                           | type 1  | 4.7      | 352                | 2.08                 |                         |
