# Supplementary material for: Cerebrospinal fluid analysis in 108 patients with progressive multifocal leukoencephalopathy
Source: Springer Nature journal article supplement (doi:10.1186/s12987-020-00227-y), 2020-10-27
Supplement: MOESM4 [file 18526168]

| sex | Age at LP (years) | cell count (cells/ $\mu$ l) | OCB     | Qalbumin | CSF protein (mg/l) | CSF lactate (mmol/l) |
|-----|-------------------|-----------------------------|---------|----------|--------------------|----------------------|
| f   | 43                | 14                          | type 2  | 5.61     | 428                | 1.54                 |
| m   | 42                | 0                           | type 2  | 2.7      | 253                | 1.6                  |
| f   | 32                | 3                           | type 2  | 3.1      | 227                | 2.9                  |
| f   | 54                | 11                          | type 2  | 7.3      | 489                | 1.7                  |
| m   | 36                | 7                           | type 2  | 4.35     | 304                | 1.94                 |
| f   | 32                | 2                           | type 2  | 4.2      | 330                | 1.9                  |
| m   | 40                | 11                          | type 2  | 7.4      | 551                | 1,6                  |
| f   | 33                | 8                           | type 2  | 6.9      | 512                | 2                    |
| m   | 46                | 7                           | type 3  | 7.4      | 559                | 1.6                  |
| f   | 38                | 6                           | type 2  | 5.3      | 434                | 3.1                  |
| m   | 30                | 11                          | type 2  | 6.1      | 512                | 1.8                  |
| f   | 45                | 5                           | type 2  | 2.3      | 236                | 2.65                 |
| m   | 47                | 10                          | type 3  | 16.4     | 1100               | 2.4                  |
| f   | 34                | 6                           | type 2  | 2.2      | 239                | 1.7                  |
| m   | 39                | 5                           | type 2  | 6.3      | 449                | 1.6                  |
| f   | 43                | 5                           | type 3  | 5.4      | 460                | 1.7                  |
| m   | 42                | 0                           | type 2  | 2.7      | 253                | 1,6                  |
| f   | 35                | 15                          | type 2  | 3.6      | 253                | 2.1                  |
| m   | 38                | 12                          | type 2a | 5.28     | 368                | 2.21                 |
| f   | 52                | 19                          | type 2  | 6.1      | 533                | 2.1                  |
| m   | 27                | 30                          | type 2  | 5.9      | 470                | 1.6                  |
| f   | 42                | 43                          | type 3  | 7.5      | 610                | 1.7                  |
| m   | 19                | 8                           | type 2  | 3.9      | 351                | 2                    |
| f   | 34                | 7                           | type 2  | 2.9      | 318                | 1.7                  |
| m   | 47                | 1                           | type 2  | 7.28     | 512                | 1.73                 |
| f   | 60                | 4                           | type 3  | 4.8      | 343                | 2.5                  |
| m   | 39                | 27                          | type 2  | 6.2      | 654                | 1.8                  |
| f   | 51                | 1                           | type 2  | 5.65     | 416                | 1.5                  |
| m   | 35                | 5                           | type 2  | 7        | 494                | 1.8                  |
| f   | 48                | 3                           | type 2  | 5.9      | 572                | 1.9                  |
| f   | 34                | 4                           | type 2  | 4.7      | 449                | 1.6                  |
| m   | 43                | 5                           | type 2  | 7.15     | 515                | 1.94                 |
| f   | 59                | 2                           | type 2  | 6.13     | 440                | 1.53                 |
| m   | 53                | 5                           | type 2  | 4.3      | 309                | 1.3                  |
| f   | 52                | 0                           | type 2  | 9.3      | 680                | 1.7                  |
| f   | 40                | 17                          | type 2  | 3.47     | 321                | 1.81                 |
| f   | 48                | 1                           | type 2  | 5.4      | 507                | 1.9                  |
| f   | 33                | 10                          | type 2  | 3.6      | 291                | 1.9                  |
| m   | 33                | 7                           | type 2  | 3.43     | 275                | 1.51                 |
| f   | 33                | 6                           | type 3  | 3.8      | 338                | 1.8                  |
| m   | 50                | 7                           | type 2  | 4.7      | 436                | 1.8                  |
| f   | 44                | 22                          | type 2  | 4.19     | 371                | 2.18                 |
| m   | 50                | 33                          | type 3  | 4.33     | 383                | 1.73                 |
| f   | 37                | 5                           | type 2  | 3.6      | 343                | 2.6                  |
| f   | 33                | 10                          | type 2  | 5.83     | 437                | 1.42                 |
| f   | 44                | 6                           | type 2  | 5.7      | 422                | 1.6                  |
| f   | 33                | 3                           | type 2  | 4.4      | 412                | 1.4                  |

|   |    |    |        |      |     |      |
|---|----|----|--------|------|-----|------|
| f | 25 | 29 | type 2 | 3.4  | 325 | 2    |
| m | 52 | 5  | type 3 | 8.26 | 479 | 1.7  |
| f | 50 | 1  | type 2 | 2.6  | 324 | 1.3  |
| f | 44 | 2  | type 2 | 3.72 | 318 | 1.6  |
| m | 52 | 4  | type 3 | 11.9 | 614 | 2.4  |
| f | 41 | 8  | type 2 | 9.2  | 616 | 1.7  |
| f | 51 | 14 | type 2 | 8.1  | 576 | 1.4  |
| f | 43 | 14 | type 2 | 5.61 | 428 | 1.54 |
